# Supplementary material for: Early Detection of High Risk Pregnancies Using Clinical and Social Data to Improve Health Outcomes
Source: Research Square preprint supplement (doi:10.21203/rs.3.rs-6567727/v1), 2025-05-13
Supplement: Supplementary file 1 [file fedeeab52a7f275435daa5d9.pdf]

## Supplementary Materials

### **Early Detection of High-Risk Pregnancies with Integrated Clinical and Social Data to Prevent Maternal and Infant Morbidity and Mortality**

Sadiq Y. Patel PhD MS MSW, Chitra Akileswaran MD MBA, Sanjay Basu MD PhD

Corresponding author: [sadiqyp@upenn.edu](mailto:sadiqyp@upenn.edu)

#### **The PDF file includes:**

Materials and Methods

Tables S1 to S10

## Materials and Methods

### Study sample inclusion criteria

The final sample included 26 states and Washington, D.C., based on data quality reported by DQ Atlas. The analysis focused on women aged 15-49 who had their first pre-delivery pregnancy visit between October 2017 and December 2018 (a 15-month period). Eligibility criteria required members to have at least 6 out of 9 months of coverage during the "prediction measurement period" and at least 8 out of 12 months during the "outcome measurement period." Patients dually enrolled in Medicare and Medicaid were excluded.

**Table 1: States to exclude and reason for exclusion**

|                     |                                               | 2019                                 | 2018                                 | 2017                                 |
|---------------------|-----------------------------------------------|--------------------------------------|--------------------------------------|--------------------------------------|
| Eligibility File    | Unstable enrollment benchmarks                | RI                                   | RI                                   | RI                                   |
|                     | Missing total Medicaid and CHIP enrollment    | None                                 | None                                 | None                                 |
|                     | Missing dual eligibility code                 | UT, AL                               | UT, AL                               | UT, AL                               |
|                     | Missing dually enrolled patients              | KY                                   | AZ, KY, MI, MA, RI                   | AZ, KY, MI, MA, RI                   |
|                     | Missing age                                   | None                                 | None                                 | None                                 |
|                     | Missing county FIPS code                      | Information not provided by DQ Atlas | Information not provided by DQ Atlas | Information not provided by DQ Atlas |
| Other Services File | Unstable claims volume                        | MN, MA, RI, NJ                       | MN, FL, MA, RI, NJ                   | MN, FL, MA, RI, NJ                   |
|                     | Claim type code                               | None                                 |                                      |                                      |
|                     | Missing diagnosis code                        | None                                 | None                                 | None                                 |
|                     | Missing procedure code (professional claims)  | UT                                   | UT                                   | UT                                   |
|                     | Missing procedure code (institutional claims) | NY, TX                               | TX, NY, GA, PA                       | TX, NY, GA, PA                       |

|                |                        |                                      |                                      |                                      |
|----------------|------------------------|--------------------------------------|--------------------------------------|--------------------------------------|
|                | Place of service code  | None (present for each claim line)   | UT                                   | UT                                   |
|                | Date of service        | Information not provided by DQ Atlas | Information not provided by DQ Atlas | Information not provided by DQ Atlas |
| Inpatient File | Unstable claims volume | OK, NY, MA, NH, RI, CT               | OK, GA, NH, MA, RI, CT               | OK, GA, NH, MA, RI, CT               |
|                | Claim type code        | None (present for each claim line)   | None (present for each claim line)   | None (present for each claim line)   |
|                | Missing diagnosis code | TN                                   | TN                                   | TN                                   |
|                | Missing admission date | ID                                   | GA                                   | GA                                   |
|                | Missing discharge date | ID, MD                               | NE, IN, GA, MD                       | NE, IN, GA, MD                       |
| Rx File        | Claims volume          | NC                                   | OH, NC, RI                           | OH, NC, RI                           |

### **Identifying the first pre-delivery pregnancy first**

We used the CMS algorithm to identify the first pre-delivery pregnancy outcome based on ICD-10-CM, revenue, and ICD-10-PCS codes. This analysis focused on ICD-10 diagnostic codes 1-12, admitting diagnosis codes, procedure codes 1-6, and revenue codes.

1. **Initial Identification:** We identified initial pregnancy visits occurring between October 2017 and December 2018.
2. **Exclusion of Prior Visits:** Patients with any prior pregnancy-related visits during this period were excluded from the sample.
3. **Exclusion of Delivery Outcomes:** Patients whose first pregnancy-related visit was classified as a delivery outcome—defined by CMS as live birth, miscarriage, stillbirth, termination, or unknown delivery outcome—were also removed.

### **Measurement period**

The "prediction measurement period" refers to the 9 months preceding the first pre-delivery pregnancy visit. The "outcome measurement period" is defined as the 12 months immediately following the first pre-delivery pregnancy visit.

Eligibility criteria required members to have at least 6 out of 9 months of coverage during the prediction measurement period and at least 8 out of 12 months of coverage during the outcome measurement period.

### **Machine learning procedures**

#### *Model Training and Testing Process*

We conducted repeated model training and testing 100 times using a Markov bootstrapping procedure. For each iteration, the model was trained and tested on randomly generated train-test splits, ensuring robust performance estimates.

#### *Point Estimates and 95% Confidence Intervals*

The point estimates and 95% confidence intervals for performance metrics were calculated based on the results of the 100 repeated train-test splits. All performance metrics noted in the prior results, including AUC, MCC, F1 Score, PPV, NPV, accuracy, sensitivity, and specificity, were measured to evaluate the model.

#### *Hyperparameters*

The following hyperparameters were used to find the optimal hyperparameters for each XGBoost model.

| Hyperparameter GridSearch                                                                                                                                                                                                                                                                                                                                                                                                                            |
|------------------------------------------------------------------------------------------------------------------------------------------------------------------------------------------------------------------------------------------------------------------------------------------------------------------------------------------------------------------------------------------------------------------------------------------------------|
| Learning rate: 0.005, 0.01, 0.02, 0.05<br>Subsample: 0.2, 0.3, 0.4, 0.5, 0.6, 0.7, 0.8, 0.9, 1.0<br>Min_child_weight: 0, 0.5, 1, 2, 3, 4, 5<br>Colsample_bytree: 0.2, 0.3, 0.4, 0.5, 0.6, 0.7, 0.8, 0.9, 1.0<br>Max_depth: 10, 12, 14, 16, 18, 20, 22, 24, 26<br>Reg_alpha: 0.0, 0.25, 0.5, 0.75, 1.0<br>Reg_lambda: 0.0, 0.25, 0.5, 0.75, 1.0<br>Gamma: 0.0, 0.25, 0.5, 0.75, 1.0<br>Colsample_bylevel: 0.2, 0.3, 0.4, 0.5, 0.6, 0.7, 0.8, 0.9, 1.0 |

**Table S1.**

Transparent reporting of a multivariable prediction model for individual prognosis or diagnosis (TRIPOD): the TRIPOD statement

| Section/Topic             |    |     | Checklist Item                                                                                                                                                                                   | Page / Section                                            |
|---------------------------|----|-----|--------------------------------------------------------------------------------------------------------------------------------------------------------------------------------------------------|-----------------------------------------------------------|
| <b>Title and abstract</b> |    |     |                                                                                                                                                                                                  |                                                           |
| Title                     | 1  | D;V | Identify the study as developing and/or validating a multivariable prediction model, the target population, and the outcome to be predicted.                                                     | Title page (page 1)                                       |
| Abstract                  | 2  | D;V | Provide a summary of objectives, study design, setting, participants, sample size, predictors, outcome, statistical analysis, results, and conclusions.                                          | Abstract (page 2)                                         |
| <b>Introduction</b>       |    |     |                                                                                                                                                                                                  |                                                           |
| Background and objectives | 3a | D;V | Explain the medical context (including whether diagnostic or prognostic) and rationale for developing or validating the multivariable prediction model, including references to existing models. | Introduction (page 3)                                     |
|                           | 3b | D;V | Specify the objectives, including whether the study describes the development or validation of the model or both.                                                                                | Introduction (page 4)                                     |
| <b>Methods</b>            |    |     |                                                                                                                                                                                                  |                                                           |
| Source of data            | 4a | D;V | Describe the study design or source of data (e.g., randomized trial, cohort, or registry data), separately for the development and validation data sets, if applicable.                          | Methods, study design and data sources (page 5)           |
|                           | 4b | D;V | Specify the key study dates, including start of accrual; end of accrual; and, if applicable, end of follow-up.                                                                                   | Methods, cohort selection and outcome definition (page 5) |
| Participants              | 5a | D;V | Specify key elements of the study setting (e.g., primary care, secondary care, general population) including number and location of centers.                                                     | Methods, cohort selection and outcome definition (page 5) |
|                           | 5b | D;V | Describe eligibility criteria for participants.                                                                                                                                                  | Methods, cohort selection and outcome definition (page 5) |
|                           | 5c | D;V | Give details of treatments received, if relevant.                                                                                                                                                | N/A                                                       |
| Outcome                   | 6a | D;V | Clearly define the outcome that is predicted by the prediction model, including how and when assessed.                                                                                           | Methods, cohort selection and outcome definition (page 5) |
|                           | 6b | D;V | Report any actions to blind assessment of the outcome to be predicted.                                                                                                                           | N/A                                                       |
| Predictors                | 7a | D;V | Clearly define all predictors used in developing or validating the multivariable prediction model, including how and when they were measured.                                                    | Methods, predictor variables (page 5-6)                   |

|                              |     |     |                                                                                                                                                                                                       |                                                            |
|------------------------------|-----|-----|-------------------------------------------------------------------------------------------------------------------------------------------------------------------------------------------------------|------------------------------------------------------------|
|                              | 7b  | D;V | Report any actions to blind assessment of predictors for the outcome and other predictors.                                                                                                            | N/A                                                        |
| Sample size                  | 8   | D;V | Explain how the study size was arrived at.                                                                                                                                                            | Figure 1, flowchart of sample inclusion/exclusion criteria |
| Missing data                 | 9   | D;V | Describe how missing data were handled (e.g., complete-case analysis, single imputation, multiple imputation) with details of any imputation method.                                                  | Supplemental methods                                       |
| Statistical analysis methods | 10a | D   | Describe how predictors were handled in the analyses.                                                                                                                                                 | Supplemental methods                                       |
|                              | 10b | D   | Specify type of model, all model-building procedures (including any predictor selection), and method for internal validation.                                                                         | Methods, statistical analysis (page 6)                     |
|                              | 10c | V   | For validation, describe how the predictions were calculated.                                                                                                                                         | Methods, statistical analysis (page 6)                     |
|                              | 10d | D;V | Specify all measures used to assess model performance and, if relevant, to compare multiple models.                                                                                                   | Methods, statistical analysis (page 6)                     |
|                              | 10e | V   | Describe any model updating (e.g., recalibration) arising from the validation, if done.                                                                                                               | Supplemental methods                                       |
| Risk groups                  | 11  | D;V | Provide details on how risk groups were created, if done.                                                                                                                                             | N/A                                                        |
| Development vs. validation   | 12  | V   | For validation, identify any differences from the development data in setting, eligibility criteria, outcome, and predictors.                                                                         | Supplemental methods                                       |
| <b>Results</b>               |     |     |                                                                                                                                                                                                       |                                                            |
| Participants                 | 13a | D;V | Describe the flow of participants through the study, including the number of participants with and without the outcome and, if applicable, a summary of the follow-up time. A diagram may be helpful. | Figure 1                                                   |
|                              | 13b | D;V | Describe the characteristics of the participants (basic demographics, clinical features, available predictors), including the number of participants with missing data for predictors and outcome.    | Table 1                                                    |
|                              | 13c | V   | For validation, show a comparison with the development data of the distribution of important variables (demographics, predictors and outcome).                                                        | Supplement Table X                                         |
| Model development            | 14a | D   | Specify the number of participants and outcome events in each analysis.                                                                                                                               | Results (page 7)                                           |
|                              | 14b | D   | If done, report the unadjusted association between each candidate predictor and outcome.                                                                                                              | N/A                                                        |
| Model specification          | 15a | D   | Present the full prediction model to allow predictions for individuals (i.e., all regression coefficients, and model intercept or baseline survival at a given time point).                           | Figures 2-4; Table 2                                       |
|                              | 15b | D   | Explain how to use the prediction model.                                                                                                                                                              | Results (page 8)                                           |
| Model                        | 16  | D;V | Report performance measures (with CIs) for the prediction model.                                                                                                                                      | Table 2                                                    |

|                           |     |     |                                                                                                                                                |                                                  |
|---------------------------|-----|-----|------------------------------------------------------------------------------------------------------------------------------------------------|--------------------------------------------------|
| performance               |     |     |                                                                                                                                                |                                                  |
| Model-updating            | 17  | V   | If done, report the results from any model updating (i.e., model specification, model performance).                                            | N/A                                              |
| <b>Discussion</b>         |     |     |                                                                                                                                                |                                                  |
| Limitations               | 18  | D;V | Discuss any limitations of the study (such as non representative sample, few events per predictor, missing data).                              | Discussion (page 10)                             |
| Interpretation            | 19a | V   | For validation, discuss the results with reference to performance in the development data, and any other validation data.                      | Discussion (page 9-10)                           |
|                           | 19b | D;V | Give an overall interpretation of the results, considering objectives, limitations, results from similar studies, and other relevant evidence. | Discussion (page 9-10)                           |
| Implications              | 20  | D;V | Discuss the potential clinical use of the model and implications for future research.                                                          | Discussion (page 9-10)                           |
| <b>Other information</b>  |     |     |                                                                                                                                                |                                                  |
| Supplementary information | 21  | D;V | Provide information about the availability of supplementary resources, such as study protocol, Web calculator, and data sets.                  | Supplement                                       |
| Funding                   | 22  | D;V | Give the source of funding and the role of the funders for the present study.                                                                  | N/A, not funding received for the present study. |

**Table S2.**

## Outcome definitions and validation criteria

Each of the following outcomes required a Z37.XX ICD-10 code for delivery, along with one of the specified codes on the same hospitalization event, to be classified as an adverse outcome. To ensure external validity, we validated our sample estimate against a national estimate. Links to both the definitions and national estimate sources are provided.

| Outcome                                       | ICD-10 Definition criteria*                                                                                                                                                                                                                                                                                                                                                                                                                                                                                                                                                                                                                                                                                                                                                                                                                                                                                                                                                                                                                                                                                                                                                                                                                                                                                                                                                                                                                                                                                                                                                                                                                                                                                                                                                                                                                                                                                                                                                              | Definition source                                                                                                                                                                 | Our estimate                                                   | National estimate | National estimate source                                                                                                  |
|-----------------------------------------------|------------------------------------------------------------------------------------------------------------------------------------------------------------------------------------------------------------------------------------------------------------------------------------------------------------------------------------------------------------------------------------------------------------------------------------------------------------------------------------------------------------------------------------------------------------------------------------------------------------------------------------------------------------------------------------------------------------------------------------------------------------------------------------------------------------------------------------------------------------------------------------------------------------------------------------------------------------------------------------------------------------------------------------------------------------------------------------------------------------------------------------------------------------------------------------------------------------------------------------------------------------------------------------------------------------------------------------------------------------------------------------------------------------------------------------------------------------------------------------------------------------------------------------------------------------------------------------------------------------------------------------------------------------------------------------------------------------------------------------------------------------------------------------------------------------------------------------------------------------------------------------------------------------------------------------------------------------------------------------------|-----------------------------------------------------------------------------------------------------------------------------------------------------------------------------------|----------------------------------------------------------------|-------------------|---------------------------------------------------------------------------------------------------------------------------|
| Severe maternal mortality and morbidity (SMM) | <p>Z37.xx and one of the following complication codes:</p> <ol style="list-style-type: none"> <li>1. I21.xx, I22.x</li> <li>2. I71.xx, I79.0</li> <li>3. N17.x, O90.4</li> <li>4. J80, J95.1, J95.2, J95.3, J95.82x, J96.0x, J96.2x, J96.9x, R06.03, R09.2</li> <li>5. O88.112, O88.113, O88.119, O88.12, O88.13</li> <li>6. I46.x, I49.0x</li> <li>7. 5A12012, 5A2204Z</li> <li>8. D65, D68.8, D68.9, O45.002, O45.003, O45.009, O45.012, O45.013, O45.019, O45.022, O45.023, O45.029, O45.092, O45.093, O45.099, O46.002, O46.003, O46.009, O46.012, O46.013, O46.019, O46.022, O46.023, O46.029, O46.092, O46.093, O46.099, O67.0, O72.3</li> <li>9. 30230H0, 30230K0, 30230L0, 30230M0, 30230N0, 30230P0, 30230R0, 30230T0, 30230H1, 30230K1, 30230L1, 30230M1, 30230N1, 30230P1, 30230R1, 30230T1, 30233H0, 30233K0, 30233L0, 30233M0, 30233N0, 30233P0, 30233R0, 30233T0, 30233H1, 30233K1, 30233L1, 30233M1, 30233N1, 30233P1, 30233R1, 30233T1, 30240H0, 30240K0, 30240L0, 30240M0, 30240N0, 30240P0, 30240R0, 30240T0, 30240H1, 30240K1, 30240L1, 30240M1, 30240N1, 30240P1, 30240R1, 30240T1, 30243H0, 30243K0, 30243L0, 30243M0, 30243N0, 30243P0, 30243R0, 30243T0, 30243H1, 30243K1, 30243L1, 30243M1, 30243N1, 30243P1, 30243R1, 30243T1</li> <li>10. O15. X</li> <li>11. I97.120, I97.121, I97.130, I97.131, I97.710, I97.711</li> <li>12. A81.2, G45.x, G46.x, G93.49, H34.0x, I60.xx, I61.xx, I62.xx, I63.00, I63.01x, I63.1xx, I63.2xx, I63.3xx, I63.4xx, I63.5xx, I63.6, I63.8x, I63.9, I65.xx, I66.xx, I67.xx, I68.xx, O22.50, O22.52,</li> <li>13. O22.53, I97.810, I97.811, I97.820, I97.821, O87.3</li> <li>14. I50.1, I50.20, I50.21, I50.23, I50.30, I50.31, I50.33, I50.40, I50.41, I50.43, I50.810, I50.811, I50.813, I50.814, I50.82, I50.83, I50.84, I50.89, I50.9, J81.0</li> <li>15. O29.112–O29.119, O29.122–O29.129, O29.192–O29.199, O29.212–O29.219, O29.292–O29.299, O74.0, O74.1, O74.2, O74.3, O89.0x, O89.1, O89.2, T88.2XXA, T88.3XXA</li> </ol> | <a href="https://www.cdc.gov/maternal-infant-health/php/severe-maternal-morbidity/icd.html">https://www.cdc.gov/maternal-infant-health/php/severe-maternal-morbidity/icd.html</a> | 2.36% of all deliveries were associated with an SMM diagnosis. | 2.36%             | <a href="https://www.ncbi.nlm.nih.gov/pmc/articles/PMC9375335/">https://www.ncbi.nlm.nih.gov/pmc/articles/PMC9375335/</a> |



|                                           |                                                                                                                                                                                                                                                                                                                                                                                                                                                                                                       |                                                                                                                                                                                                                                            |                                                                |                   |                                                                                                                                                                                                                                                                                                        |
|-------------------------------------------|-------------------------------------------------------------------------------------------------------------------------------------------------------------------------------------------------------------------------------------------------------------------------------------------------------------------------------------------------------------------------------------------------------------------------------------------------------------------------------------------------------|--------------------------------------------------------------------------------------------------------------------------------------------------------------------------------------------------------------------------------------------|----------------------------------------------------------------|-------------------|--------------------------------------------------------------------------------------------------------------------------------------------------------------------------------------------------------------------------------------------------------------------------------------------------------|
|                                           | 16. A32.7, A40.x, A41.x, I76, O85, O86.04, R65.20, R65.21, T81.12XA, T81.44XA<br>17. O75.1, R57.x, T78.2XXA, T81.10XA, T81.11XA, T81.19XA, T88.6XXA<br>18. D57.00, D57.01, D57.02, D57.211, D57.212, D57.219, D57.411, D57.412, D57.419, D57.811, D57.812, D57.819<br>19. I26.x, O88.012–O88.03, O88.212–O88.23, O88.312–O88.33, O88.812–O88.83, T80.0XXA<br>20. 0UT90ZL, 0UT90ZZ, 0UT97ZL, 0UT97ZZ<br>21. 0B110F4, 0B113F4, 0B114F4<br>22. 5A1935Z, 5A1945Z, 5A1955Z                                 |                                                                                                                                                                                                                                            |                                                                |                   |                                                                                                                                                                                                                                                                                                        |
| Adverse pregnancy outcome (APO)           | Z37.xx and one of the following codes:<br>1. O42.xx<br>2. O11.xx, O14.xx, O15.xx<br>3. O13.xx, O16.xx<br>4. O99.81, O24.4x<br>5. O36.5x<br>6. O45.xx<br>7. Z37.1x, Z37.3x, Z37.4x, Z37.7x<br>8. O60.1x                                                                                                                                                                                                                                                                                                | <a href="https://pmc.ncbi.nlm.nih.gov/articles/PMC8520131/">https://pmc.ncbi.nlm.nih.gov/articles/PMC8520131/</a><br><br><a href="https://pmc.ncbi.nlm.nih.gov/articles/PMC5266622/">https://pmc.ncbi.nlm.nih.gov/articles/PMC5266622/</a> | 35.7% of all deliveries were associated with an APO diagnosis. | 42.6%             | <a href="https://www.ncbi.nlm.nih.gov/pmc/articles/PMC8520131/">https://www.ncbi.nlm.nih.gov/pmc/articles/PMC8520131/</a>                                                                                                                                                                              |
| Neonatal intensive care (NICU) admissions | Z37.xx and one of the following codes:<br>CPT codes:<br>1. P0720, P0721, P0722, P0723, P0724, P0725, P0726<br>2. P0730, P0731, P0732, P0733, P0734, P0735, P0736, P0737, P0738, P0739<br>3. P0701, P0702, P0703, P071, P0714, P0715, P0716, P0717, P0718<br>4. P050, P0500, P0502, P0503, P0504, P0505, P0506, P0507, P0508, P0509, P051, P0510, P0511, P0512, P0513, P0514, P0515, P0516, P0517, P0518<br>5. 99468, 99469, 99477, 99478, 99479, 99480<br>Revenue codes:<br>6. 0172, 0173, 0174, 0179 | <a href="https://pmc.ncbi.nlm.nih.gov/articles/PMC10916318/#SD1">https://pmc.ncbi.nlm.nih.gov/articles/PMC10916318/#SD1</a>                                                                                                                | 11.6% of all deliveries were associated with a NICU admission  | 9.6%<br><br>10.2% | <a href="https://pubmed.ncbi.nlm.nih.gov/38012436/">https://pubmed.ncbi.nlm.nih.gov/38012436/</a><br><br><a href="https://www.medicaid.gov/medicaid/quality-of-care/downloads/mih-beneficiary-profile.pdf">https://www.medicaid.gov/medicaid/quality-of-care/downloads/mih-beneficiary-profile.pdf</a> |

**Table S3.**  
Predictor variables and definitions

| Predictor Type            | Measure                                                                                  | Definition                                                                                                                                                                                                                                                                                                   |
|---------------------------|------------------------------------------------------------------------------------------|--------------------------------------------------------------------------------------------------------------------------------------------------------------------------------------------------------------------------------------------------------------------------------------------------------------|
| Demographic               | State                                                                                    | Defined as a member's state of residence.                                                                                                                                                                                                                                                                    |
|                           | Age                                                                                      | Defined as the age in 2017, measured in years                                                                                                                                                                                                                                                                |
|                           | Sex                                                                                      | Defined as male, female, or missing                                                                                                                                                                                                                                                                          |
|                           | Race/ethnicity                                                                           | Defined as Asian, White, Multiracial, Black, Hispanic, Native American, Hawaiian, or Missing                                                                                                                                                                                                                 |
|                           | Disabled                                                                                 | Defined as disabled or non-disabled. Members were classified as having a disability if either the Demographic and Eligibility file or the Disability and Need Supplement file indicated a disability.                                                                                                        |
| Clinical history          | Number of clinical conditions within each CCSR category, represented as separate columns | Clinical conditions are defined by using ICD-10 diagnostic codes, which are crosswalked to their corresponding Clinical Classification Software Refined (CCSR) categories. Each CCSR category is one-hot encoded into a unique column and summed to provide the total count of conditions for each category. |
|                           | Number of procedure codes within each BETOS category, represented as separate columns    | Defined by crosswalking Current Procedural Terminology (CPT) codes to the Restructured Berenson-Eggers Type of Service (BETOS) System codes. Each BETOS category is one-hot encoded into a unique column and summed to provide the total count of procedures for each category.                              |
|                           | Number of NDC codes within each drug class category, represented as separate columns     | Defined by crosswalking NDC codes to drug classes using the CMS Prescription Drug Data Collection. Each drug class category is one-hot encoded into a unique column and summed to provide the total count of medications for each category.                                                                  |
|                           | Number of visits for each clinician type is represented as separate columns              | Defined using the Centers for Medicare and Medicaid Services clinician specialty classification. Each clinician specialty category is one-hot encoded into a unique column and summed to calculate the total count for each specialty.                                                                       |
| Measures of clinical risk | Number of all-cause ED visits and hospitalizations                                       | Defined ED visits based on Current Procedural Terminology codes, revenue codes, and place-of-service codes. To count "episodes" of care, we linked ED and inpatient claim records for the same patient if dates of service were congruent or contiguous.                                                     |
|                           | Percentage of all-cause ED visits and hospitalizations for non-emergent conditions       | We defined non-emergent ED visits as those meeting the New York University ED Patch Algorithm definition. Non-emergent inpatient admissions were defined using the Agency for Healthcare Research and Quality's Prevention Quality Indicator.                                                                |
|                           | Slope of all-cause ED visits and hospitalizations                                        | Defined as the monthly rate of change for all-cause ED visits and hospitalizations across each month in 2017, representing the trend or trajectory over the year.                                                                                                                                            |
|                           | Slope of non-emergent ED visits and hospitalizations                                     | Defined as the monthly rate of change for non-emergent ED visits and hospitalizations across each month in 2017, representing the trend or trajectory over the year.                                                                                                                                         |

|                      |                                                           |                                                                                                                                                                                                                                                                                                  |
|----------------------|-----------------------------------------------------------|--------------------------------------------------------------------------------------------------------------------------------------------------------------------------------------------------------------------------------------------------------------------------------------------------|
|                      | Slope of number of medication prescriptions               | Defined as the monthly rate of change for the number of medication prescriptions across each month in 2017, representing the trend or trajectory over the year.                                                                                                                                  |
|                      | Number of hospitalization days                            | Defined as the total number of hospitalization days in 2017.                                                                                                                                                                                                                                     |
|                      | Number of long-term care episodes                         | Defined as the total number of long-term care episodes in 2017.                                                                                                                                                                                                                                  |
|                      | Days supply of medication                                 | Defined as the total days supplied across all medications in 2017.                                                                                                                                                                                                                               |
|                      | Number of unique medications                              | Defined by the number of distinct National Drug Codes (NDC) present in a patient's medication history, representing each unique prescription.                                                                                                                                                    |
|                      | Total number of medication prescriptions                  | Defined by the total number of National Drug Codes (NDC) present in a patient's medication history, representing all prescriptions.                                                                                                                                                              |
|                      | Medication adherence                                      | For each patient, we calculated the difference between the first and last prescription fill for each unique medication (based on the NDC code), divided by the total days supplied. We then took the mean of these values across all medications to provide an average measure for each patient. |
| Individual<br>SDoH   | Household size                                            | Defined as single, 2-5 individuals, 6 or more individuals, or missing                                                                                                                                                                                                                            |
|                      | Household income                                          | Defined as 0-100% or federal poverty level, 100-200%, 200% or more, or missing                                                                                                                                                                                                                   |
|                      | Proficient in English                                     | Defined as yes, no, or missing                                                                                                                                                                                                                                                                   |
|                      | Married                                                   | Defined as yes, no, or missing                                                                                                                                                                                                                                                                   |
|                      | US citizen                                                | Defined as yes, no, or missing                                                                                                                                                                                                                                                                   |
|                      | Receipt of Supplement security income (SSI)               | Defined as yes, no, or missing                                                                                                                                                                                                                                                                   |
|                      | Receipt of social security disability insurance (SSDI)    | Defined as yes, no, or missing                                                                                                                                                                                                                                                                   |
|                      | Receipt of temporary assistance for needy families (TANF) | Defined as yes, no, or missing                                                                                                                                                                                                                                                                   |
| County-level<br>SDoH | Substance use services facility availability              | Number of substance use services facilities accepting Medicaid per 1,000 population                                                                                                                                                                                                              |
|                      | Substance use treatment facility availability             | Number of substance use treatment facilities providing medication                                                                                                                                                                                                                                |
|                      | Mental health services facility availability              | Number of mental health services facilities accepting Medicaid per 1,000 population                                                                                                                                                                                                              |
|                      | Urgent care availability                                  | Number of urgent care facilities per 1,000 population                                                                                                                                                                                                                                            |
|                      | Physician assistant and nurse practitioner availability   | Number of APRNs/PAs per 1,000 population                                                                                                                                                                                                                                                         |
|                      | Primary care physician availability                       | Defined as no shortage, partial county, or whole county, as defined by Health Professional Shortage Area (HPSA)                                                                                                                                                                                  |
|                      | Mental health provider availability                       | Defined as no shortage, partial county, or whole county, as defined by Health Professional Shortage Area (HPSA)                                                                                                                                                                                  |
|                      | Community mental health center availability               | Number of community mental health centers per 1,000 population                                                                                                                                                                                                                                   |

|  |                                                   |                                                                                                                                   |
|--|---------------------------------------------------|-----------------------------------------------------------------------------------------------------------------------------------|
|  | Federally quality health center availability      | Number of federally qualified health centers per 1,000 population                                                                 |
|  | Rural health clinic availability                  | Number of rural health clinics per 1,000 population                                                                               |
|  | Hospitals with obstetrics department availability | Number of hospitals with obstetrics department per 1,000 population                                                               |
|  | Percentage of private for-profit hospitals        | Percentage of all hospitals that are private for-profit hospitals                                                                 |
|  | Proximity to urgent care                          | Median distance in miles to the nearest urgent care, calculated using population weighted tract centroids in the county           |
|  | Proximity to emergency department                 | Median distance in miles to the nearest emergency department, calculated using population weighted tract centroids in the county  |
|  | Proximity to hospital with obstetrics department  | Median distance in miles to the nearest obstetrics department, calculated using population weighted tract centroids in the county |
|  | Rurality                                          | Population density per square mile                                                                                                |
|  | Poverty rate                                      | Percentage of population with income below poverty ratio under 0.50                                                               |
|  | Public assistance rate                            | Percentage of households with public assistance income or receiving food stamps/SNAP benefits                                     |
|  | High school education rate                        | Percentage of population with less than high school education (ages 25 and over)                                                  |
|  | Injury-related death rate                         | Number of deaths from injury per 100,000 population                                                                               |
|  | Opioid-related overdose rate                      | Number of drug overdose deaths involving any opioid per 100,000 population                                                        |
|  | Air quality                                       | Percentage of days with good air quality                                                                                          |
|  | Heat index                                        | Total number of days with daily maximum heat index, absolute threshold: 100°F                                                     |

**Table S4.****SDoH improvement sensitivity analysis**

The baseline rate represents the mean rate across our patient sample (n=190,698). The adjusted rate reflects the mean rate after accounting for transformations in SDoH values. We hypothesized that patients living closer to healthcare resources or in areas with fewer drug overdose deaths or lower poverty rates would experience fewer adverse events. Additionally, areas with higher healthcare resources were expected to have fewer adverse events. Table 1 in the main text presents the county-level (n=1,325) mean, median, and interquartile range.

|                                                                                           | Baseline rate<br>mean (median, 25th, 75th) | Hypothesized adjustment to<br>reduce adverse events | Adjusted rate<br>mean (median, 25th, 75th) | Relative risk reduction<br>estimates (% reduction<br>in adverse events) | Cumulative population<br>impact projection (%<br>reduction in adverse events) |
|-------------------------------------------------------------------------------------------|--------------------------------------------|-----------------------------------------------------|--------------------------------------------|-------------------------------------------------------------------------|-------------------------------------------------------------------------------|
| Number of APRNs/PAs per 1,000<br>population                                               | 2.3 (1.8, 1.4, 2.7)                        | 75th percentile                                     | 3.0 (2.7, 2.7, 2.7)                        | 3.21                                                                    | 3.21                                                                          |
| Number of drug overdose deaths<br>involving any opioid per 100,000<br>population          | 23.0 (20.8, 15.4, 27.4)                    | 25th percentile                                     | 14.9 (15.4, 15.4, 15.4)                    | 2.43                                                                    | 6.20                                                                          |
| Percentage of population with<br>income below poverty ratio under<br>0.50                 | 6.5 (6.1, 5.0, 7.5)                        | 25th percentile                                     | 4.7 (5.0, 5.0, 5.0)                        | 1.63                                                                    | 8.27                                                                          |
| Number of substance use services<br>facilities accepting Medicaid per<br>1,000 population | 0.034 (0.0, 0.0, 0.05)                     | 75th percentile                                     | 0.04 (0.04, 0.04, 0.042)                   | 1.47                                                                    | 11.37                                                                         |
| Number of rural health clinics per<br>1,000 population                                    | 0.1 (0.0, 0.0, 0.0)                        | 75th percentile                                     | 0.09 (0.05, 0.05, 0.05)                    | 1.37                                                                    | 15.22                                                                         |
| Median distance to hospital<br>delivering obstetric care                                  | 4.5 (2.9, 2.2, 4.4)                        | 25th percentile                                     | 2.1 (2.2, 2.2, 2.2)                        | 1.35                                                                    | 17.61                                                                         |
| Percentage of all hospitals that are<br>private for-profit hospitals                      | 61.1 (60.3, 54.1, 68.8)                    | 25th percentile                                     | 52.2 (54.1, 54.1, 54.1)                    | 1.27                                                                    | 21.56                                                                         |
| Number of community mental<br>health centers per 1,000 population                         | 0.0 (0.0, 0.0, 0.0)                        | 75th percentile                                     | 0.1 (0.1, 0.1, 0.1)                        | 1.05                                                                    | 23.38                                                                         |
| Number of federally qualified health<br>centers per 1,000 population                      | 0.04 (0.03, 0.01, 0.04)                    | 75th percentile                                     | 0.1 (0.04, 0.04, 0.04)                     | 0.72                                                                    | 24.96                                                                         |
| Number of hospitals with obstetrics<br>department per 1,000 population                    | 0.019 (0.01, 0.01, 0.02)                   | 75th percentile                                     | 0.02 (0.01, 0.01, 0.02)                    | 0.68                                                                    | 25.68                                                                         |

|                                                                                                                                  |                                                        |                                                                                        |                                                      |      |       |
|----------------------------------------------------------------------------------------------------------------------------------|--------------------------------------------------------|----------------------------------------------------------------------------------------|------------------------------------------------------|------|-------|
| Median distance in miles to the nearest urgent care, calculated using population weighted tract centroids in the county          | 8.1 (2.5, 1.8, 8.8)                                    | 25th percentile                                                                        | 1.7 (1.8, 1.8, 1.8)                                  | 0.36 | 26.37 |
| Median distance in miles to the nearest emergency department, calculated using population weighted tract centroids in the county | 3.5 (2.5, 1.9, 3.6)                                    | 25th percentile                                                                        | 1.8 (1.9, 1.9, 1.9)                                  | 0.33 | 30.58 |
| Number of mental health services facilities accepting Medicaid per 1,000 population                                              | 0.03 (0.020, 0.013, 0.037)                             | 75th percentile                                                                        | 0.05 (0.04, 0.04, 0.04)                              | 0.11 | 31.60 |
| Mental health provider availability as defined by HPSA as no shortage, partial county, or whole county                           | no shortage - 5.7%<br>partial - 34.3%<br>whole - 60.0% | Improve each county to the next highest category (eg, partial shortage to no shortage) | no shortage - 40.0%<br>partial - 60.0%<br>whole - 0% | 0.09 | 31.74 |
| Primary care availability as defined by HPSA as no shortage, partial county, or whole county                                     | no shortage - 7.6%<br>partial - 30.6%<br>whole - 61.7% | Improve each county to the next highest category (eg, partial shortage to no shortage) | no shortage - 38.2%<br>partial - 61.8%<br>whole - 0% | 0.04 | 31.84 |

**Table S5.**

Prevalence of SMM and APO submeasures

Submeasures do not add up to 100%, as an individual could have multiple diagnosis on the delivery episode

| <b>Severe maternal morbidity and mortality (n=4,154)</b> | <b>Count</b> | <b>Percentage</b> |
|----------------------------------------------------------|--------------|-------------------|
| Blood Transfusion                                        | 1936         | 46.6              |
| Acute Respiratory Distress Syndrome                      | 524          | 12.6              |
| Ventilation                                              | 520          | 12.5              |
| Eclampsia                                                | 411          | 9.9               |
| sepsis                                                   | 402          | 9.7               |
| Pulmonary Edema / Acute Heart Failure                    | 240          | 5.8               |
| Puerperal Cerebrovascular Disorders                      | 147          | 3.5               |
| Puerperal Cerebrovascular Disorders                      | 147          | 3.5               |
| Disseminated Intravascular Coagulation                   | 138          | 3.3               |
| shock                                                    | 127          | 3.1               |
| Air and Thrombotic Embolism                              | 116          | 2.8               |
| Hysterectomy                                             | 89           | 2.1               |
| Conversion of Cardiac Rhythm                             | 44           | 1.1               |
| Amniotic Fluid Embolism                                  | 41           | 1                 |
| Sickle Cell Disease With Crisis                          | 43           | 1                 |
| Cardiac Arrest / Ventricular Fibrillation                | 24           | 0.6               |
| Acute Myocardial Infarction                              | 20           | 0.5               |
| Severe Anesthesia Complications                          | 17           | 0.4               |
| Aneurysm                                                 | 7            | 0.2               |
| Temporary Tracheostomy                                   | 4            | 0.1               |
| Heart Failure / Arrest During Surgery or Procedure       | 0            | 0                 |
| <b>Adverse pregnancy outcomes (n=68,922)</b>             | <b>Count</b> | <b>Percentage</b> |
| Premature rupture of membranes                           | 19402        | 28.2              |

|                           |       |      |
|---------------------------|-------|------|
| Gestational hypertension  | 16139 | 23.4 |
| Gestational diabetes      | 14467 | 21.0 |
| Preeclampsia              | 13844 | 20.1 |
| Spontaneous preterm labor | 12465 | 18.1 |
| Poor fetal growth         | 9796  | 14.2 |
| Placental abruption       | 2497  | 3.6  |
| Stillbirth                | 1921  | 2.8  |



**Table S6.**

Gestational age during first pregnancy visit

Gestational age during first pregnancy visit among individuals with an adverse outcome.

| Gestational age (weeks) | count | percentage |
|-------------------------|-------|------------|
| < 8                     | 17124 | 23.78      |
| 8                       | 5064  | 7.03       |
| 9                       | 3749  | 5.21       |
| 10                      | 3303  | 4.59       |
| 11                      | 2945  | 4.09       |
| 12                      | 3719  | 5.16       |
| 13                      | 2562  | 3.56       |
| 14                      | 1687  | 2.34       |
| 15                      | 1527  | 2.12       |
| 16                      | 1621  | 2.25       |
| 17                      | 1323  | 1.84       |
| 18                      | 1472  | 2.04       |
| 19                      | 1753  | 2.43       |
| 20                      | 2459  | 3.41       |
| 21                      | 1365  | 1.9        |
| 22                      | 1013  | 1.41       |
| 23                      | 855   | 1.19       |
| 24                      | 866   | 1.2        |
| 25                      | 748   | 1.04       |
| 26                      | 715   | 0.99       |
| 27                      | 745   | 1.03       |
| 28                      | 897   | 1.25       |

|               |      |      |
|---------------|------|------|
| <b>29</b>     | 699  | 0.97 |
| <b>30</b>     | 809  | 1.12 |
| <b>31</b>     | 744  | 1.03 |
| <b>32</b>     | 950  | 1.32 |
| <b>33</b>     | 913  | 1.27 |
| <b>34</b>     | 992  | 1.38 |
| <b>35</b>     | 1132 | 1.57 |
| <b>29</b>     | 699  | 0.97 |
| <b>30</b>     | 809  | 1.12 |
| <b>31</b>     | 744  | 1.03 |
| <b>32</b>     | 950  | 1.32 |
| <b>33</b>     | 913  | 1.27 |
| <b>34</b>     | 992  | 1.38 |
| <b>35</b>     | 1132 | 1.57 |
| <b>36</b>     | 1503 | 2.09 |
| <b>37</b>     | 1642 | 2.28 |
| <b>38</b>     | 1715 | 2.38 |
| <b>39</b>     | 1918 | 2.66 |
| <b>40</b>     | 813  | 1.13 |
| <b>41</b>     | 160  | 0.22 |
| <b>42</b>     | 13   | 0.02 |
| <b>&gt;48</b> | 1    | 0    |

**Table S7.**

Standardized mean differences across clinical and social risk factors

We measure the standardized mean differences between patients with and without an adverse event across all model features, considering a standardized mean difference of 0.10 or lower as indicating no meaningful differences.

The file is located: [https://github.com/sadiqypatel/Pregnancy\\_Risk\\_Model](https://github.com/sadiqypatel/Pregnancy_Risk_Model)

- ICD10 code groupers (for diagnoses) can be found:
  - <https://hcup-us.ahrq.gov/toolssoftware/ccsr/dxcsr.jsp>
- CPT code groupers (for types of care) can be found:
  - <https://data.cms.gov/provider-summary-by-type-of-service/provider-service-classifications/restructured-betos-classification-system>
- NDC code groupers (for medications) can be found:
  - <https://www.cms.gov/ccio/programs-and-initiatives/other-insurance-protections/prescription-drug-data-collection>
- Details regarding Area-level SDOH measures can be found in Materials and Methods Section

**Table S8.**  
Model performance metrics

|                     |           | AUC                    | Accuracy                | F1                      | MCC                     | NPV                     | PPV                     | Sensitivity             | Specificity             |
|---------------------|-----------|------------------------|-------------------------|-------------------------|-------------------------|-------------------------|-------------------------|-------------------------|-------------------------|
| non-SDoH model      | Composite | 0.579<br>(0.578-0.580) | 0.633<br>(0.632-0.634)  | 0.134<br>(0.133-0.135)  | 0.107<br>(0.106-0.108)  | 0.634<br>(0.633-0.635)  | 0.613<br>(0.610-0.616)  | 0.075<br>(0.074-0.076)  | 0.971<br>(0.970-0.972)  |
| Logistic regression | NICU      | 0.861<br>(0.860-0.862) | 0.965<br>(0.964-0.966)  | 0.047<br>(0.045-0.049)  | 0.116<br>(0.112-0.119)  | 0.966<br>(0.965-0.967)  | 0.593<br>(0.578-0.609)  | 0.025<br>(0.024-0.026)  | 0.999<br>(0.998-1.000)  |
|                     | APO       | 0.583<br>(0.582-0.584) | 0.651<br>(0.650-0.652)  | 0.114<br>(0.113-0.115)  | 0.101<br>(0.100-0.103)  | 0.653<br>(0.652-0.654)  | 0.603<br>(0.600-0.607)  | 0.063<br>(0.062-0.064)  | 0.977<br>(0.976-0.978)  |
|                     | SMM       | 0.651<br>(0.649-0.653) | 0.978<br>(0.977-0.979)  | 0.034<br>(0.031-0.036)  | 0.098<br>(0.092-0.103)  | 0.979<br>(0.978-0.980)  | 0.585<br>(0.557-0.612)  | 0.017<br>(0.016-0.019)  | 0.999<br>(0.998-1.000)  |
| SDoH model          | Composite | 0.954<br>(0.953,0.955) | 0.894<br>(0.893, 0.895) | 0.853<br>(0.852, 0.854) | 0.773<br>(0.772, 0.774) | 0.893<br>(0.892, 0.894) | 0.896<br>(0.895, 0.897) | 0.813<br>(0.812, 0.814) | 0.943<br>(0.942, 0.944) |
| Xgboost             | NICU      | 0.971<br>(0.970-0.972) | 0.989<br>(0.987-0.989)  | 0.816<br>(0.814-0.817)  | 0.822<br>(0.820-0.823)  | 0.989<br>(0.987-0.990)  | 0.702<br>(0.699-0.704)  | 0.702<br>(0.699-0.704)  | 0.999<br>(0.998-1.000)  |
|                     | APO       | 0.917<br>(0.916-0.919) | 0.900<br>(0.899-0.901)  | 0.852<br>(0.851-0.853)  | 0.779<br>(0.778-0.780)  | 0.898<br>(0.897-0.899)  | 0.903<br>(0.902-0.904)  | 0.806<br>(0.805-0.807)  | 0.952<br>(0.951-0.953)  |
|                     | SMM       | 0.953<br>(0.952-0.954) | 0.994<br>(0.993-0.995)  | 0.831<br>(0.830-0.832)  | 0.839<br>(0.837-0.841)  | 0.994<br>(0.993-0.995)  | 0.991<br>(0.990-0.992)  | 0.716<br>(0.712-0.719)  | 0.999<br>(0.998-1.000)  |
| non-SDoH model      | Composite | 0.931<br>(0.930-0.932) | 0.863<br>(0.862-0.864)  | 0.797<br>(0.796-0.798)  | 0.707<br>(0.706-0.708)  | 0.846<br>(0.845-0.847)  | 0.903<br>(0.902-0.904)  | 0.713<br>(0.712-0.714)  | 0.954<br>(0.953-0.955)  |
| Xgboost             | NICU      | 0.965<br>(0.964-0.966) | 0.987<br>(0.986-0.989)  | 0.778<br>(0.776-0.780)  | 0.790<br>(0.788-0.793)  | 0.987<br>(0.986-0.988)  | 0.985<br>(0.984-0.986)  | 0.643<br>(0.640-0.646)  | 0.999<br>(0.998-1.000)  |
|                     | APO       | 0.930<br>(0.929-0.931) | 0.869<br>(0.868-0.870)  | 0.793<br>(0.792-0.794)  | 0.712<br>(0.711-0.713)  | 0.854<br>(0.853-0.855)  | 0.909<br>(0.908-0.910)  | 0.704<br>(0.703-0.705)  | 0.961<br>(0.960-0.962)  |
|                     | SMM       | 0.902<br>(0.901-0.904) | 0.992<br>(0.991-0.993)  | 0.786<br>(0.784-0.789)  | 0.801<br>(0.799-0.804)  | 0.992<br>(0.991-0.993)  | 0.997<br>(0.996-0.998)  | 0.649<br>(0.646-0.653)  | 0.999<br>(0.998-1.000)  |

**Table S9.**

## Constellation of social and clinical risk factors

The table is organized by measure type, with each row describing the percentage of members experiencing risk for each outcome measure.

| Measure                                                                                              | Measure type      | No adverse event | Any adverse event | APO   | SMM   | NICU  |
|------------------------------------------------------------------------------------------------------|-------------------|------------------|-------------------|-------|-------|-------|
| Percentage of members residing in counties in bottom quartile of air quality                         | Area SDoH         | 21.5             | 20.7              | 19.5  | 26.8  | 51.6  |
| Percentage of members residing in counties in top quartile for distance to emergency department      | Area SDoH         | 24.0             | 23.4              | 24.0  | 20.6  | 9.5   |
| Percentage of members residing in counties in top quartile for distance to obstetric care distance   | Area SDoH         | 25.2             | 24.4              | 25.0  | 21.6  | 9.1   |
| Percentage of members residing in counties in bottom quartile of mental health facility rate         | Area SDoH         | 25.1             | 24.5              | 23.5  | 28.7  | 48.5  |
| Percentage of members residing in counties in bottom quartile of APRN rate                           | Area SDoH         | 33.4             | 32.0              | 30.8  | 35.1  | 65.0  |
| Percentage of members residing in counties in bottom quartile of FQHC rate                           | Area SDoH         | 33.7             | 32.5              | 31.8  | 34.8  | 50.9  |
| Percentage of members residing in counties in bottom quartile of rural health clinic rate            | Area SDoH         | 54.8             | 56.7              | 56.8  | 55.1  | 58.1  |
| Percentage of members residing in counties in bottom quartile of community mental health center rate | Area SDoH         | 69.2             | 67.6              | 67.6  | 67.6  | 82.7  |
| Percentage of members residing in counties with whole county primary care shortage areas             | Area SDoH         | 85.1             | 85.1              | 85.5  | 85.9  | 93.5  |
| Percentage of members residing in counties in bottom quartile of urgent care facility rate           | Area SDoH         | 85.8             | 85.8              | 85.6  | 87.1  | 92.0  |
| Percentage of members residing in counties in bottom quartile of substance use facility rate         | Area SDoH         | 100.0            | 100.0             | 100.0 | 100.0 | 100.0 |
| Percentage of members with a bipolar diagnosis                                                       | Behavioral health | 0.5              | 0.5               | 0.5   | 0.3   | 0.3   |
| Percentage of members with a stress disorder diagnosis                                               | Behavioral health | 1.0              | 1.2               | 1.2   | 1.0   | 0.7   |

|                                                                             |                     |      |      |      |      |      |
|-----------------------------------------------------------------------------|---------------------|------|------|------|------|------|
| Percentage of members with an anxiety or depression diagnosis               | Behavioral health   | 4.1  | 4.4  | 4.5  | 4.4  | 3.5  |
| Percentage of members with at least 1 self harm diagnosis                   | Behavioral health   | 0.1  | 0.2  | 0.2  | 0.1  | 0.0  |
| Percentage of members with at least 1 opioid use disorder diagnosis         | Behavioral health   | 0.4  | 0.4  | 0.4  | 0.4  | 0.3  |
| Percentage of members with at least 1 diabetes diagnosis                    | Clinical            | 0.3  | 0.7  | 0.7  | 0.7  | 1.1  |
| Percentage of members with at least 1 obesity diagnosis                     | Clinical            | 1.6  | 2.3  | 2.3  | 1.9  | 2.9  |
| Percentage of members with at least 1 hypertension diagnosis                | Clinical            | 0.9  | 2.5  | 2.6  | 3.8  | 1.9  |
| Percentage of members with at least 1 chest pain diagnosis                  | Clinical            | 2.8  | 3.2  | 3.2  | 3.2  | 3.6  |
| Percentage of members with at least 1 medication prescription               | Clinical            | 11.7 | 11.0 | 11.0 | 10.5 | 10.4 |
| Percentage of members with at least 1 pre-diabetes diagnosis                | Clinical            | 0.1  | 0.1  | 0.1  | 0.1  | 0.1  |
| Percentage of members with at least 1 mild anemia diagnosis                 | Clinical            | 0.1  | 0.2  | 0.2  | 0.2  | 0.2  |
| Percentage of members with at least 1 mild hypertension diagnosis           | Clinical            | 0.2  | 0.4  | 0.4  | 0.5  | 0.3  |
| Percentage of members with at least 1 nutrition deficiency diagnosis        | Clinical            | 2.5  | 2.5  | 2.6  | 3.8  | 2.9  |
| Percentage of members with a positive slope for medication prescriptions    | Clinical            | 34.3 | 34.2 | 34.2 | 35.0 | 35.0 |
| Percentage of members with at least 1 all-cause acute care visit            | Clinical            | 19.7 | 20.5 | 20.5 | 22.6 | 19.6 |
| Percentage of members with a positive slope for all-cause acute care visits | Clinical            | 18.8 | 20.5 | 20.5 | 22.5 | 20.0 |
| Percentage of members with at least 1 injury-related diagnosis              | Domestic violence   | 6.7  | 7.0  | 7.1  | 7.1  | 6.2  |
| Percentage of members with at least 1 family history diagnosis              | Family history      | 0.1  | 0.1  | 0.1  | 0.1  | 0.1  |
| Percentage of members with at least 1 avoidable acute care visit            | Primary care access | 16.1 | 17.0 | 17.1 | 19.5 | 16.2 |

|                                                                                                          |                     |      |      |      |      |      |
|----------------------------------------------------------------------------------------------------------|---------------------|------|------|------|------|------|
| Percentage of members with a positive slope for avoidable acute care visits                              | Primary care access | 12.6 | 13.9 | 13.9 | 15.0 | 13.4 |
| Proportion of White patients (>1 means overrepresented relative to sample size; 1 means proportional)    | Race/ethnicity      | 1.0  | 1.0  | 1.0  | 0.8  | 0.8  |
| Proportion of Hispanic patients (>1 means overrepresented relative to sample size; 1 means proportional) | Race/ethnicity      | 1.0  | 1.0  | 0.9  | 1.0  | 1.6  |
| Proportion of Black patients (>1 means overrepresented relative to sample size; 1 means proportional)    | Race/ethnicity      | 0.9  | 1.1  | 1.1  | 1.2  | 0.5  |
| Percentage of members with at least 1 SDoH-related diagnosis                                             | Social risk         | 0.2  | 0.3  | 0.3  | 0.3  | 0.2  |

**Table S10.**

Model performance by race/ethnicity

The minority category included individuals identifying as Asian, Multiracial, Native American, or Hawaiian.

|             | <b>SDoH model (xgboost)</b> |                    | <b>non-SDoH model (xgboost)</b> |                      |
|-------------|-----------------------------|--------------------|---------------------------------|----------------------|
| <b>Race</b> | <b>sensitivity</b>          | <b>specificity</b> | <b>sensitivity</b>              | <b>specificity</b>   |
| minority    | 84.6 (83.8, 85.2)           | 93.3 (93.2, 94.0)  | 0.770 (0.765, 0.781)            | 0.932 (0.930, 0.938) |
| White       | 81.6 (81.0, 81.8)           | 95.3 (95.2, 95.4)  | 0.728 (0.725, 0.737)            | 0.942 (0.940, 0.944) |
| Hispanic    | 76.5 (75.9, 76.7)           | 95.0 (94.9, 95.2)  | 0.686 (0.682, 0.692)            | 0.964 (0.962, 0.965) |
| Black       | 81.1 (80.9, 81.8)           | 92.7 (92.4, 92.9)  | 0.710 (0.709, 0.715)            | 0.961 (0.960, 0.963) |
